# Supplementary material
Source: Royal Society of Chemistry journal article supplement (doi:10.1039/d6ay00545d)
Supplement: d6ay00545d1.pdf [file d6ay00545d1.pdf]

## Supporting Information

# **Boronate affinity-based ratiometric fluorescent quantum dot sensors for the rapid detection of streptomycin from food**

**Yanli Fan<sup>1</sup>, Hengxi Liu<sup>2</sup>, Wanying Geng<sup>3</sup>, Shiping Cang<sup>3</sup>, Daojin Li<sup>3,\*</sup>**

<sup>1</sup> School of Food and Drug, Luoyang Normal University, Luoyang 471934, PR China

<sup>2</sup> College of Physics and Electronic Information, Luoyang Normal University, Luoyang 471934, PR China.

<sup>3</sup> College of Chemistry and Chemical Engineering, and Henan Key Laboratory of Function-Oriented Porous Materials, Luoyang Normal University, Luoyang 471934, PR China.

## Supporting Figures

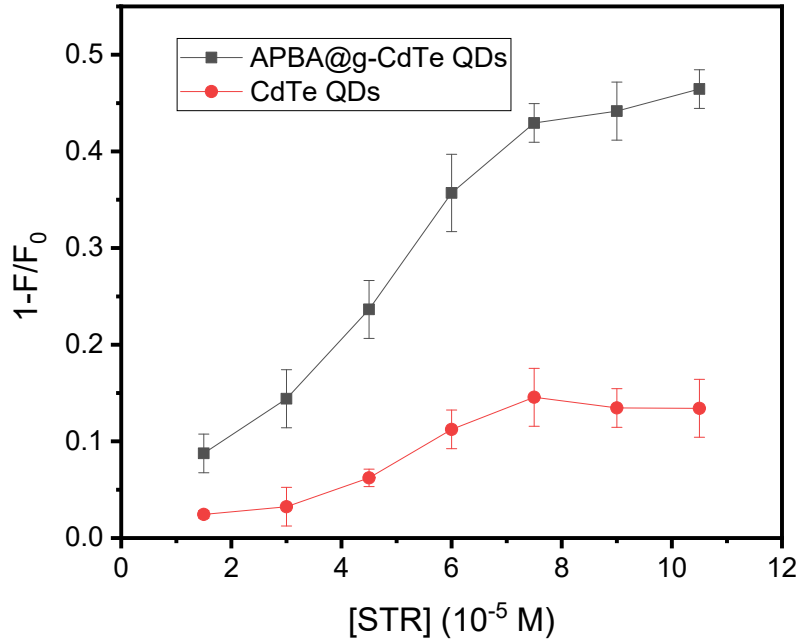

**Fig. S1** Fluorescence intensity change of CdTe QDs and APBA@g-CdTe QDs with various amount of STR.

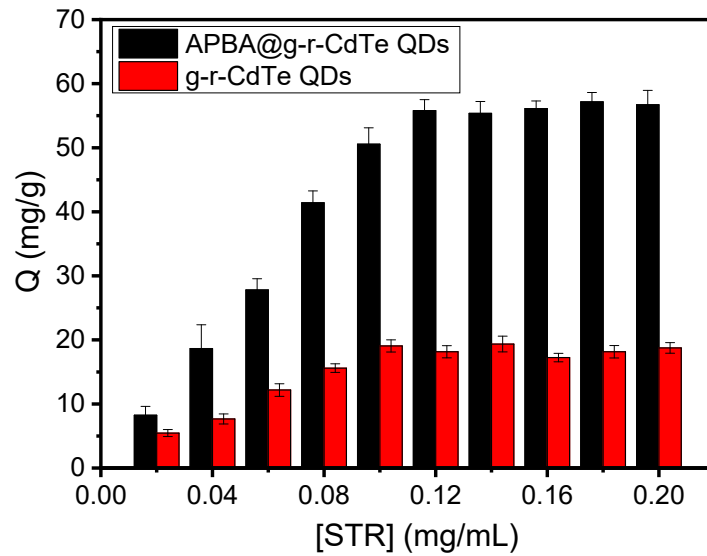

**Fig. S2** Comparison of adsorption performance of APBA@g-r-CdTe QDs and g-r-CdTe QDs

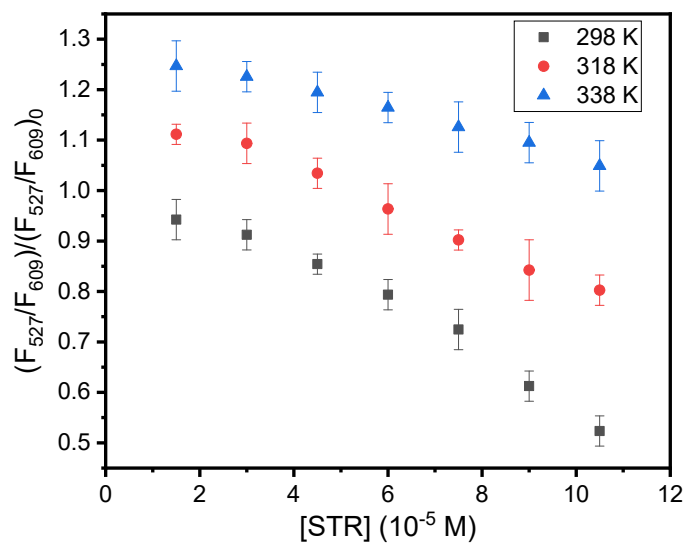

**Fig. S3** The dual-emission fluorescence intensity ratio change of APBA@g-r-CdTe QDs with different concentrations of STR at different temperatures.

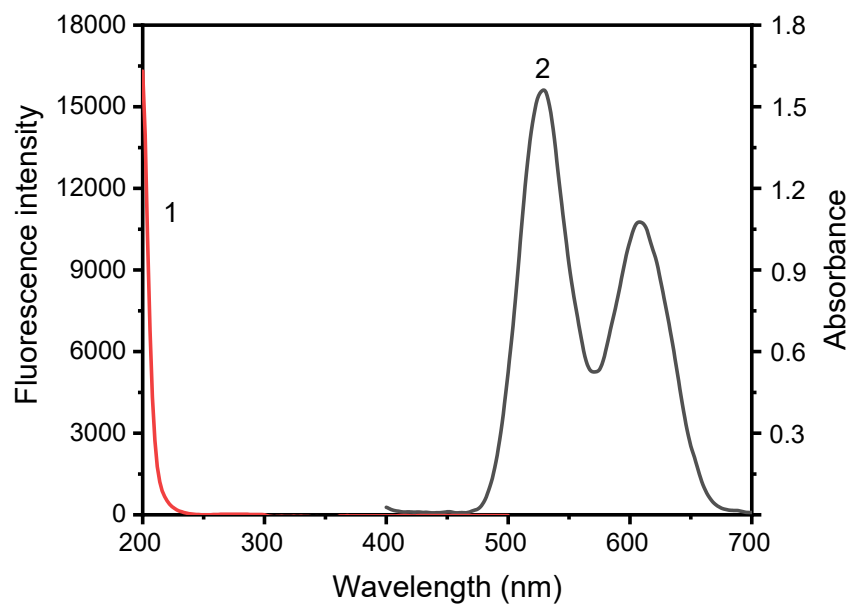

**Fig. S4** The UV-Vis absorption of STR (1) and fluorescence emission of APBA@g-r-CdTe QDs (2).
